# Supplementary material for: Morbid Obesity in Women Is Associated with an Altered Intestinal Expression of Genes Related to Cancer Risk and Immune, Defensive, and Antimicrobial Response
Source: MDPI journal article supplement (doi:10.3390/biomedicines10051024), 2022-04-29
Supplement: s1 [file s1]

**Supplementary Table S1.** -Anthropometric and biochemical variables for each patient of the three groups of women.

|                     |           | <b>Age<br/>(years)</b> | <b>Weight<br/>(kg)</b> | <b>BMI<br/>(Kg/m<sup>2</sup>)</b> | <b>Waist<br/>(cm)</b> | <b>Hip<br/>(cm)</b> | <b>Glucose<br/>(mg/dl)</b> | <b>Insulin<br/>(<math>\mu</math>IU/ml)</b> | <b>Cholesterol<br/>(mg/dl)</b> | <b>Triglycerides<br/>(mg/dl)</b> | <b>HOMA-IR</b> |
|---------------------|-----------|------------------------|------------------------|-----------------------------------|-----------------------|---------------------|----------------------------|--------------------------------------------|--------------------------------|----------------------------------|----------------|
| <b>NO-lower-IR</b>  | Patient 1 | 53                     | 63                     | 25.2                              | 89                    | 105                 | 78                         | 8.2                                        | 210                            | 68                               | 1.59           |
|                     | Patient 2 | 40                     | 70                     | 27.3                              | 82                    | 107                 | 78                         | 13.0                                       | 190                            | 75                               | 2.50           |
|                     | Patient 3 | 38                     | 51                     | 17.6                              | 75                    | 95                  | 68                         | 7.7                                        | 173                            | 149                              | 1.30           |
|                     | Patient 4 | 47                     | 58                     | 22.7                              | 70                    | 105                 | 77                         | 8.3                                        | 162                            | 95                               | 1.58           |
|                     | Patient 5 | 47                     | 53                     | 21.5                              | 68                    | 101                 | 78                         | 7.1                                        | 199                            | 70                               | 1.38           |
|                     | Patient 6 | 37                     | 50                     | 19.3                              | 74                    | 102                 | 81                         | 6.1                                        | 199                            | 92                               | 1.23           |
| <b>MO-lower-IR</b>  | Patient 1 | 52                     | 128                    | 46.5                              | 136                   | 160                 | 87                         | 14.0                                       | 160                            | 110                              | 3.01           |
|                     | Patient 2 | 49                     | 108                    | 43.8                              | 116                   | 130                 | 80                         | 10.0                                       | 213                            | 135                              | 1.99           |
|                     | Patient 3 | 42                     | 110                    | 46.0                              | 113                   | 143                 | 85                         | 8.4                                        | 209                            | 114                              | 1.78           |
|                     | Patient 4 | 44                     | 137                    | 55.0                              | 125                   | 160                 | 72                         | 12.0                                       | 151                            | 80                               | 2.14           |
|                     | Patient 5 | 56                     | 123                    | 50.5                              | 130                   | 147                 | 84                         | 9.1                                        | 186                            | 58                               | 1.91           |
|                     | Patient 6 | 48                     | 96                     | 40.0                              | 107                   | 129                 | 83                         | 10.5                                       | 178                            | 78                               | 2.15           |
|                     | Patient 7 | 37                     | 107                    | 43.9                              | 112                   | 125                 | 87                         | 17.0                                       | 215                            | 185                              | 3.66           |
| <b>MO-higher-IR</b> | Patient 1 | 32                     | 129                    | 49.8                              | 129                   | 153                 | 98                         | 29.7                                       | 180                            | 156                              | 7.19           |
|                     | Patient 2 | 61                     | 119                    | 41.9                              | 136                   | 143                 | 101                        | 18.3                                       | 154                            | 146                              | 4.58           |
|                     | Patient 3 | 53                     | 105                    | 43.9                              | 116                   | 131                 | 103                        | 19.4                                       | 196                            | 103                              | 4.95           |
|                     | Patient 4 | 45                     | 148                    | 57.1                              | 130                   | 165                 | 93                         | 24.6                                       | 213                            | 210                              | 5.65           |
|                     | Patient 5 | 44                     | 150                    | 57.5                              | 144                   | 160                 | 89                         | 24.1                                       | 169                            | 202                              | 5.30           |
|                     | Patient 6 | 49                     | 161                    | 55.7                              | 141                   | 159                 | 104                        | 50.2                                       | 231                            | 138                              | 12.90          |
|                     | Patient 7 | 45                     | 123                    | 52.2                              | 132                   | 150                 | 82                         | 25.2                                       | 247                            | 117                              | 5.10           |
|                     | Patient 8 | 31                     | 114                    | 42.0                              | 130                   | 134                 | 82                         | 20.4                                       | 153                            | 47                               | 4.13           |
